1 **Profiling grapevine trunk pathogens *in planta*: A case for**  
2 **community-targeted DNA metabarcoding**

3  
4 Abraham Morales-Cruz<sup>1</sup>, Rosa Figueroa-Balderas<sup>1</sup>, Jadran F. García<sup>1</sup>, Eric Tran<sup>1</sup>, Philippe E.  
5 Rolshausen<sup>2</sup>, Kendra Baumgartner<sup>3</sup>, and Dario Cantu<sup>1\*</sup>

6  
7 <sup>1</sup> Department of Viticulture and Enology, University of California Davis, Davis CA 95616, USA

8 <sup>2</sup> Department of Botany and Plant Sciences, University of California, Riverside, CA 92521, USA

9 <sup>3</sup> United States Department of Agriculture - Agricultural Research Service, Crops Pathology and  
10 Genetics Research Unit, Davis, CA, 95616, USA

11  
12 \*Corresponding author:

13 Dario Cantu

14 One Shields Ave, Davis CA 95616, USA

15 Phone: +1 530 752 2929

16 Fax: +1 530 752 0382

17 Email: [dacantu@ucdavis.edu](mailto:dacantu@ucdavis.edu)

18  
19 Keywords: high-throughput DNA sequencing, amplicon sequencing, metagenomics, grapevine  
20 trunk diseases, Esca dieback, Eutypa dieback, Botryosphaeria dieback, Phomopsis dieback

21 **ABSTRACT**

22 DNA metabarcoding, commonly used in exploratory microbial ecology studies, is a promising  
23 method for the simultaneous *in planta*-detection of multiple pathogens associated with disease  
24 complexes, such as the grapevine trunk diseases. Their detection is particularly challenging, due  
25 to the presence within an individual wood lesion of multiple co-infecting trunk pathogens and  
26 other wood-colonizing fungi, which span a broad range of taxa in the Fungal Kingdom. As such,  
27 we designed metabarcoding primers, using as template the ribosomal internal transcribed spacer  
28 of grapevine trunk-associated Ascomycete fungi (GTAA) and compared them to two universal  
29 primer widely used in microbial ecology. We first performed *in silico* simulations and then tested  
30 the primers by high-throughput amplicon sequencing of (i) multiple combinations of mock  
31 communities, (ii) time-course experiments with controlled inoculations, and (iii) diseased field  
32 samples from vineyards under natural levels of infection. All analyses showed that GTAA had  
33 greater affinity and sensitivity, compared to those of the universal primers. Importantly, with  
34 GTAA, profiling of mock communities and comparisons with shotgun-sequencing metagenomics  
35 of field samples gave an accurate representation of genera of important trunk pathogens, namely  
36 *Phaeomoniella*, *Phaeoacremonium*, and *Eutypa*, the abundances of which were greatly over- or  
37 under-estimated with universal primers. Overall, our findings not only demonstrate that DNA  
38 metabarcoding gives qualitatively and quantitatively accurate results when applied to grapevine  
39 trunk diseases, but also that primer customization and testing are crucial to ensure the validity of  
40 DNA metabarcoding results.

41

42

## 43 INTRODUCTION

44 Grapevine trunk diseases affect the longevity and productivity of grapevines (*Vitis vinifera*) in all  
45 major growing regions of the world [1-4]. They are caused by numerous species of fungi that infect  
46 and damage the wood, causing chronic infections [5-7]. Among the most common grapevine trunk  
47 diseases are Eutypa dieback (primarily caused by *Eutypa lata*), Esca (primarily caused by  
48 *Phaeoacremonium minimum*, *Phaeomoniella chlamydospora*, and *Fomitiporia* spp.),  
49 Botryosphaeria dieback (primarily caused by *Neofusicoccum parvum*, *Diplodia seriata*, among  
50 other fungi in the Botryosphaeriaceae family), Phomopsis dieback (primarily caused by *Diaporthe*  
51 *ampelina*), and Black foot (caused by *Cylindrocarpon*, *Campylocarpon*, and *Ilyonectria* spp.) [4,  
52 8-11]. Because of the characteristic mixed infections, trunk diseases represent a disease complex  
53 [12, 13]. In addition to infections of pruning wounds by airborne and splash-dispersed spores,  
54 trunk pathogens may be introduced to a healthy vineyard by asymptomatic propagation material.  
55 Fungi associated with grapevine trunk diseases have been found in rootstock mother-plants, rooted  
56 rootstock cuttings, bench-grafts, and young grafted vines [14-16]. The presence of multiple species  
57 in the same vine complicates disease diagnosis and, consequently, proper timing of practices to  
58 limit infection in the vineyard and to propagate clean nursery stock.

59 Taxonomic identification of fungi associated with grapevine wood is currently done by the  
60 following steps: (i) plating grapevine woody tissue on nutrient-rich agar plates, (ii) hyphal-tip  
61 colony isolation to pure cultures, (iii) DNA extraction from fungal mycelium, (iv) PCR  
62 amplification of taxonomically informative loci, such as the nuclear ribosomal internal transcribed  
63 spacer (ITS), elongation factor, and  $\beta$ -tubulin, and (v) comparisons of amplicon sequences with  
64 sequence databases [17-19]. PCR-based diagnostics represent a significant improvement  
65 compared to traditional approaches that depend on morphological features for species

66 identification and, thus, require skilled expertise in mycology [20]. However, these approaches  
67 still require an initial culturing step, which may limit the detection of slow-growing fungi.  
68 Alternatively, with species or genus-specific markers, PCR could be used to determine *in planta*  
69 the presence of certain species, thereby skipping the culturing step [21, 22]. One limitation of this  
70 approach, however, is that it may not detect all trunk pathogens in a given sample [23, 24]. Indeed,  
71 certain combinations of fungi may be important in the severity of symptom expression [25].  
72 Because trunk pathogens cause mixed infections, attempts have been made to characterize the  
73 composition of the trunk-pathogen community. For example, finger-printing techniques like  
74 Automated Ribosomal Intergenic Spacer Analysis (ARISA) [26] and Single-Strand Conformation  
75 Polymorphism (SSCP) [27, 28] have been used to compare fungal communities among different  
76 samples of grapevine wood, although these do not identify trunk pathogens to the species level. A  
77 DNA macroarray system, based on reverse dot-blot hybridization containing oligonucleotides  
78 complementary to portions of the  $\beta$ -tubulin locus, was developed for species-level identification,  
79 specifically for detection of trunk pathogens that cause Young vine decline [23]. We previously  
80 described a strategy, based on untargeted shotgun sequencing of metagenomic DNA and RNA, to  
81 detect and quantify trunk pathogens *in planta* simultaneously [13]. Despite clear advantages over  
82 other approaches, this method still has its limitations, such as relying on assembled genomes, as  
83 well as costly library preparation and computationally intensive analyses.  
84 DNA metabarcoding, which has been used extensively for the analysis of microbial communities  
85 [29-32], may provide a cheaper and more scalable method for the characterization of trunk-  
86 pathogen communities. This approach has already been applied to other pathosystems to address  
87 a variety of research objectives. For example, DNA metabarcoding has been used to identify  
88 candidate pathogens [33, 34] and potential biocontrol agents [35], to profile putative plant

89 pathogens associated with insects [36], and to diagnose quarantine pathogens as part of national  
90 plant-protection programs [37-39]. DNA metabarcoding infers taxonomic composition of complex  
91 biological samples by amplifying, sequencing, and analyzing target genomic regions [40, 41]. The  
92 ribosomal ITS, which is under low evolutionary pressure and, thus, presents high levels of  
93 variation between closely related species, has been commonly used as a barcode for the analysis  
94 of fungal biodiversity [42, 43]. ITS is typically amplified by universal primers that anneal to the  
95 conserved flanking sequences. The “universality” of the primers, which derives from their ability  
96 to amplify a broad range of taxonomically unrelated species across the Fungal Kingdom [44], is  
97 exploited in studies that aim to profile fungal communities, typically in exploratory analyses of  
98 environmental samples. We hypothesized that although universal primers may capture broad  
99 biodiversity in exploratory analyses, they may provide less accurate representation of microbial  
100 pathogen communities than primers that are designed and optimized to amplify species known to  
101 be associated with those communities, based on prior knowledge of disease etiology. After all,  
102 grapevine-trunk diseases are one of the most widely studied disease complexes, in terms of species  
103 composition (Lamichane and Venturi, 2015). In this work, we designed and evaluated  
104 metabarcoding primers that were optimized to amplify the ITS regions of grapevine trunk  
105 pathogens. By a combination of *in silico* simulations, and analyses of ‘mock’ communities,  
106 samples from controlled inoculations, and samples from symptomatic vineyards, we demonstrated  
107 that community-customized metabarcoding provides greater more qualitatively and quantitevely  
108 accurate representation of trunk-pathogen communities than common universal primers.

109

## 110 **RESULTS**

### 111 **Primer design, selection, and validation with target species**

112 We designed multiple degenerate primers that target the internal transcribed spacer (ITS) of  
113 grapevine trunk-associated ascomycetes (GTAA) using the TrunkDiseaseID as reference database  
114 [20]. Primer potential was determined *in silico*, considering the amplicon size and estimating the  
115 number of sequence hits to the database, their alignment mismatches, and gap scores. From a total  
116 of twenty forward and three reverse degenerate primers, primers GTAA182f and GTAA526r  
117 (GTAA, hereinafter) performed the best and were selected for further testing. The GTAA primers  
118 target the entire ITS2 region with the forward and reverse primers aligning to the 5.8S ribosomal  
119 RNA and the large subunit ribosomal ribonucleic acid (LSU), respectively (**Table 1** and **Figure**  
120 **1A**). The primers produced amplicons of approximately 350 bp from isolates of seven trunk  
121 pathogens, as expected based on the amplicon size predicted from the 213 ITS sequences of  
122 ascomycetes in the TrunkDiseaseID database ( $301.72 \pm 7.53$  bp; **Figure 1B**). We obtained a  
123 similar amplicon size when the GTAA primers were used to amplify total DNA extracted from  
124 naturally infected grapevines with trunk-disease symptoms (**Figure 1C**). Failure to amplify DNA  
125 of two negative controls, grape leaves, and of the bacterium *Agrobacterium tumefaciens*, supports  
126 their specificity to Fungi (**Figure 1B**). Amplicon sequences matched the correct species, when  
127 aligned to the NCBI non-redundant nucleotide database using BLASTn, thereby confirming the  
128 ITS region amplified by the GTAA primers is informative for taxonomic assignments (**Additional**  
129 **File 1**).

130 GTAA primer precision, sensitivity, efficiency, and usefulness for metabarcoding of grapevine  
131 trunk pathogens were compared to those of the BITS [45] and SP primers [46]. The BITS primers  
132 are widely used for fungal metabarcoding analysis in vineyards and grape must (e.g.: [47-51]),  
133 whereas the SP primers [46] were recently used by [52] for fungal microbial ecology, and  
134 implemented in the Earth Microbiome Project (<http://www.earthmicrobiome.org>; **Table 1** and

135 **Figure 1A**). Samples were from DNA extracted from potted grapevines either inoculated with *N.*  
136 *parvum* or from non-inoculated controls. By sampling PCR reactions every five cycles, the GTAA  
137 amplicon was visible on an agarose gel starting at 20 cycles, whereas those of SP and BITS were  
138 visible at 25 and 30 cycles, respectively (**Figure 1D**). Furthermore, SP produced multiple bands,  
139 which may be due to non-specific binding and/or chimeric amplicons. Based on qPCR with the  
140 same samples, the average Ct values for GTAA were approximately nine cycles lower than those  
141 of BITS ( $P < 1.85e^{-04}$ ) and SP ( $P < 3.50e^{-04}$ ) (**Figure 1E**). Overall, our findings suggest a higher  
142 affinity of the GTAA primers, when amplifying samples containing grapevine trunk pathogens.

### 143 ***In silico* simulation of amplification and taxonomic identification**

144 We then carried out an *in silico* simulation that compared the potential amplification bias and  
145 taxonomic usefulness of GTAA, BITS, and SP primers using a comprehensive dataset of fungi  
146 associated with trunk diseases. We compiled a custom database of 521 full-length ITS sequences  
147 across 17 genera (**Figure 2A, Additional File 2**). We included only full-length ITS sequences to  
148 be able to compare primers that amplify different regions of the ITS (**Figure 1A**). *In silico*  
149 amplification of each sequence in the custom database was carried out considering all alternative  
150 sequences of degenerated primers and allowing a series of mismatches between primer and  
151 template sequences. *In silico* amplification was carried out testing all possible combinations of  
152 allowed mismatches, from 0 to 5 mismatches in the first five nucleotides of the primer (head) and  
153 0 to 2 mismatches in the last two nucleotides of the primer (tail). GTAA primers amplified a  
154 higher number of sequences than BITS and SP primers, for every parameter tested (**Figure 2B**).  
155 When no mismatches between primer and target were allowed, GTAA primers amplified 85.80%,  
156 SP primers amplified 13.63%, and BITS primers were predicted to amplify none of the sequences  
157 in the database. When at least two mismatches were allowed in the tail of the primer, BITS and SP

158 primers amplified only 16.70% and 30.33% of target sequences, respectively, whereas GTAA  
159 primers amplified 86.75%. With the most permissive parameters, GTAA primers amplified  
160 98.08% of the sequences, and BITS and SP primers amplified 97.89% and 25.91%, respectively.  
161 The requirement of multiple mismatches for BITS primers to achieve a similar number of  
162 sequences as GTAA primers is consistent with the cycle-sampling results (**Figure 1D**), and  
163 suggests that GTAA primers are more efficient than BITS at amplifying the ITS of grapevine trunk  
164 pathogens.

165 To determine if amplicons generated by GTAA primers are informative for taxonomic assignment,  
166 we analyzed with Mothur [53] the amplicons that were generated by the simulation. By comparing  
167 the assigned genera (observed) with the expected genera for each primer set we assessed false  
168 positive (FP; i.e, erroneously assigned), false negative (FN; i.e, not amplified or not assigned), and  
169 true positive (TP; i.e, correctly assigned, **Figure 2C**) rates. GTAA primers had the highest  
170 sensitivity ( $TP/(TP+FN)*100 = 89.50 \pm 6.45\%$ ), followed by BITS ( $54.25 \pm 47.86\%$ ), and SP  
171 ( $20.50 \pm 2.53\%$ ). SP and GTAA primers displayed similar precision (SP:  $TP/(TP+FP)*100 = 97.50$   
172  $\pm 1.00\%$ ; GTAA:  $97.00 \pm 0.00\%$ ), which was higher than that of BITS primers ( $72.25 \pm 48.18\%$ ).  
173 The different performance of the three primer sets in the simulation appeared to be mostly due to  
174 amplification bias against certain genera (**Figure 2D**). GTAA primers amplified and correctly  
175 assigned to the proper genera a larger fraction of sequences than the other two primer sets for 14  
176 out of 17 genera tested. This was the case for the following widely distributed trunk pathogens:  
177 *Eutypa* (GTAA:  $98.0 \pm 4.0\%$ , BITS:  $53.8 \pm 53.8\%$ , and SP:  $44.0 \pm 4.0\%$ ), *Diaporthe* (GTAA:  $96.5$   
178  $\pm 1.3\%$ , BITS:  $51.3 \pm 53.6\%$ , and SP:  $18.7 \pm 9.3\%$ ), and *Phaeoacremonium* (GTAA:  $95.5 \pm 3.0\%$ ,  
179 BITS:  $51.5 \pm 56.1\%$ , and SP:  $18.7 \pm 9.0\%$ ). BITS primers correctly assigned more sequences for  
180 *Lasiodiplodia* (GTAA:  $71.0 \pm 8.0\%$ , BITS:  $75.0 \pm 50.0\%$ , and SP:  $0.0 \pm 0.0\%$ ) and *Cylindrocarpon*



181 (GTAA:  $35.5 \pm 41.0\%$ , BITS:  $46.3 \pm 33.54\%$ , and SP:  $0.0 \pm 0.0\%$ ). SP primers correctly assigned  
182 more sequences for *Campylocarpon* (GTAA:  $50.0 \pm 57.7\%$ , BITS:  $50.0 \pm 57.7\%$ , and SP:  $75.0 \pm$   
183  $50.0\%$ ). Overall, this simulation predicted that, unlike the two universal primer sets, GTAA  
184 primers amplify ITS of more trunk pathogens and allow taxonomic assignment with greater  
185 sensitivity (i.e., higher true positive rate) and specificity (i.e., lower false negative rate). SP primers  
186 were not included in further experiments, due to their poor performance in these early stages.

### 187 **Analysis of mock communities and infection time course**

188 To evaluate the primers for characterizing the species composition of mixed infections, we first  
189 started by sequencing with an Illumina MiSeq and analyzing mock communities (**Figure 3A**).  
190 Although DNA was extracted from stems with no symptoms of trunk disease to be used as a pure  
191 source of grape DNA, both primer sets detected fungi, mostly belonging to the genera  
192 *Campylocarpon* and *Phaeoacremonium* (**Figure 3A**). When grape DNA was mixed with DNAs  
193 of *Phaeoa. minimum* and *Phaeom. chlamydospora* both primer sets identified the correct taxa, with  
194 small relative deviation from expected values (GTAA  $\delta = 11.02 \pm 7.0\%$ ; BITS  $\delta = 16.68 \pm$   
195  $11.39\%$ ). For mock communities including *Eutypa*, GTAA primers detected this trunk pathogen  
196 in similar amounts to the expected abundance ( $\delta = 9.74 \pm 1.10\%$ ), whereas BITS primers greatly  
197 underestimated its abundance ( $\delta = 88.87 \pm 1.27\%$ ). In mock communities with equal  
198 concentrations of DNA from *E. lata*, *Phaeoa. minimum*, *Phaeom. chlamydospora*, *N. parvum*, *D.*  
199 *seriata*, and *D. ampelina*, there was underrepresentation of *Eutypa* ( $\delta = 16.70 \pm 0.12\%$ ), and  
200 *Phaeoacremonium* ( $\delta = 13.10 \pm 0.63\%$ ), and overrepresentation of *Phaeomoniella* ( $\delta = 24.34 \pm$   
201  $1.56\%$ ) by BITS primers (**Figure 3A**). The correlation of expected and observed abundances in  
202 these mock communities was greater for GTAA ( $R = 0.92$ ) than BITS ( $R = 0.67$ ; **Figure 3B**).  
203 Because DNA was mixed in equal amounts, the expected relative abundance of each genus was

204 16.6%. GTAA primers detected *Eutypa* at  $16.42 \pm 2.41\%$ , whereas BITS primers detected this  
205 trunk pathogen at  $0.05 \pm 0.03\%$ . In the case of *Diplodia*, GTAA primers estimated the abundance  
206 of the genus at  $3.13 \pm 0.48\%$  and BITS primers at  $28.9 \pm 0.8\%$ . Interestingly, neither primer set  
207 was able to detect properly *Diaporthe*, reporting only  $0.58 \pm 0.23\%$  and  $0.87 \pm 0.15\%$  for GTAA  
208 and BITS primers, respectively. Nonetheless, GTAA primers provide a better qualitative and  
209 quantitative representation of important trunk pathogens.

210 We then tested the two primers using grape samples collected at different time points after  
211 controlled inoculation with a trunk pathogen. The objective of this analysis was to determine if the  
212 metabarcoding approach could detect quantitative differences between samples at early and late  
213 stages of infection. Vines were inoculated with *N. parvum* and stem samples were collected at 24  
214 hours, 2 weeks, and 6 weeks post-inoculation. Plants non-inoculated wounded (NIW) and non-  
215 inoculated non-wounded (NINW) were included as controls. As expected, *Neofusicoccum* was  
216 predominant in the inoculated wounded (IW) samples, but absent from the controls (**Figure 4**),  
217 except for a single NIW sample, possibly due to cross-contamination during wounding or from  
218 contamination of the propagation material. Both primer sets revealed a five-fold increase in the  
219 average percentage of *Neofusicoccum* between 24 hours and 6 weeks post-inoculation.

## 220 **Analysis of field samples and comparison with reference-based shotgun metagenome** 221 **sequencing**

222 We then tested the primers on naturally infected grapevines. We used the same 28 field samples  
223 described in [13], which allowed us to compare the metabarcoding approach with the quantitative  
224 taxonomic profiles obtained by a reference-based shotgun metagenome sequencing. The samples  
225 were grouped according to symptoms into *Eutypa* dieback (ED), Esca (ES), wood canker without  
226 foliar symptoms (WC), and apparently-healthy (AH). All 28 field samples were amplified with

227 both GTAA and BITS primers, with SP primers used for a subset. Taxonomy assignment based  
228 on amplicon metabarcoding detected 14 genera, in addition to those with genomes in the  
229 multispecies reference, with abundances  $> 0.05\%$  in one or more samples (**Additional File 3**).  
230 Both GTAA and BITS primer sets identified *Alternaria*, *Cyphellophora*, and *Penicillium*, whereas  
231 *Cladosporium*, *Aureobasidium*, *Gibberella*, and *Cryptovalsa* were only identified by GTAA  
232 primers, and *Angustimassarina*, *Exophiala*, *Erysiphe*, *Meyerozyma*, *Acremonium*, and  
233 *Vishniacozyma* by BITS primers. GTAA primers revealed species abundances at very similar  
234 levels to those obtained by metagenomics analysis (**Figure 5A**), with a strong linear correlation  
235 between the two approaches ( $R = 0.95$ ; **Figure 5B**), which was higher than those of both BITS ( $R$   
236  $= 0.63$ ) and SP primers ( $R = 0.27$ ). In agreement with the other results described above, BITS  
237 primers underestimated *Eutypa* in *Eutypa*-dieback samples and overrepresented *Phaeoconiella* in  
238 *Esca* samples. The even weaker correlation obtained with SP primers was due to the strong bias  
239 against *Eutypa* and *Diaporthe*. GTAA primers showed stronger correlations across all genera of  
240 trunk pathogens ( $0.89 < R < 0.99$ , **Figure 5C**) compared to those of BITS ( $0.58 < R < 0.75$ ). Both  
241 primer sets showed a low correlation for *Neofusicoccum*, likely due to the low abundance of this  
242 genus in the samples assayed. Overall, our findings confirm the universal primers have a  
243 significant bias against important taxa and were outperformed by our GTAA primers for trunk  
244 pathogens.

## 245 **DISCUSSION**

246 In this study, we tested the application of DNA metabarcoding to profile the fungal taxa associated  
247 with grapevine trunk diseases. We show that DNA metabarcoding of ribosomal ITS amplified with  
248 commonly-adopted universal primers consistently misrepresented the abundance of important  
249 trunk pathogen species, such as *Eutypa* and *Phaeoconiella*. The customization of primer design

250 using trunk pathogen sequences as template led to improved the results with greater sensitivity.  
251 This was likely due to greater homology between the GTAA primers and the ITS of the grapevine  
252 trunk pathogens they target. On average the sequence identity of the grapevine trunk pathogen  
253 targets was significantly greater with the GTAA primers ( $97.4 \pm 5.5\%$ ;  $P < 2e-16$ ) than with the  
254 other universal primers (BITS:  $90.2 \pm 7.1\%$ ; SP:  $83.3 \pm 0.2.2\%$ ) used in the study. Amplification  
255 bias of universal ITS primers due to higher levels of mismatches for certain taxonomic group were  
256 observed previously using *in silico* PCR [54, 55]. Importantly, we also showed that the GTAA  
257 primers had higher sensitivity while maintaining a precision threshold for taxonomic assignment  
258 of 97%, suggesting that the customization of the target region also played a role in improving the  
259 DNA metabarcoding for these organisms. We should stress out that BITS and SP primers are not  
260 the only available universal primers and the goal of this study was not to provide a comprehensive  
261 survey of all universal ITS metabarcoding primers. BITS and SP were selected, because they are  
262 both widely used DNA barcoding primers, including in studies conducted on vineyard and wine  
263 must samples [46-51]. We cannot rule out that other universal primers that were not tested in this  
264 study may have performed differently. However, the results presented in this study show that  
265 universal primers may not be always appropriate to study a fungal community and, when fungal  
266 community composition is available, researchers should consider customizing their DNA  
267 metabarcoding primers. In addition, we illustrate the value of assessing both the amplification and  
268 taxonomy usefulness of the metabarcoding primers *in silico* prior to downstream wet lab  
269 evaluations.

270 In addition to customization of primers, the inclusion of other DNA barcodes should help  
271 overcome some of the limitations associated with the ITS region, such as copy number variation  
272 between and within species and low resolution in separating some phylogenetically closely related

273 fungal species [42, 56]. For example, the ITS region does not accurately identify species of plant-  
274 pathogenic fungi like *Alternaria*, *Botryosphaeria*, and *Diaporthe* [57]. The genera for which the  
275 GTAA primers consistently underestimated abundances like *Lasiodiplodia*, *Botryosphaeria*,  
276 *Diplodia*, and *Diaporthe* are known to be difficult to be resolved with the ITS region alone [57].  
277 The high correlation between metagenomics and metabarcoding results using the GTAA primers  
278 suggest that copy number variation of the ITS region is not an overwhelming issue for the  
279 grapevine trunk pathogens present in the field samples. Nonetheless, we expect that the inclusion  
280 of additional barcodes, such as  $\beta$ -tubulin and elongation factor 1- $\alpha$ , will help increase accuracy of  
281 taxonomic identification at the species level and help measure those genera for which the ITS is  
282 known not to be effective [20, 23, 58, 59].

## 283 CONCLUSIONS

284 As trunk diseases are complex diseases caused by mixed infections, DNA metabarcoding should  
285 provide a rapid and effective method for high-throughput multispecies identification overcoming  
286 the limitations of currently applied diagnostic methods. Universal primers are advantageous in  
287 exploratory analysis where *a priori* knowledge on the taxonomic composition of the samples is  
288 limited or not available. However, a more targeted approach should be used when the objective is  
289 to study a more defined group of microorganisms, like the grapevine trunk pathogens which  
290 symptoms have been consistently associated with certain fungal species [4, 20, 60]. Overall, the  
291 results presented here demonstrated that DNA metabarcoding can be applied to grapevine trunk  
292 diseases. With further improvement of taxonomic identification by combining multiple barcoding  
293 loci and of quantification by measurement of direct correlation between fungal biomass and PCR  
294 amplification cycles, we envision DNA metabarcoding to be routinely applied in trunk pathogen  
295 research and diagnostics. DNA metabarcoding provides multiple advantages to methods employed

296 in the past. Namely, there is no need of fungal isolation, it allows high number of samples to be  
297 analyzed at the same time given the multiplexing potential of the technology, and takes advantage  
298 of the constantly improving high-throughput sequencing technologies. Since wood pathogens may  
299 remain asymptomatic in young, non-stressed vines, propagation material may contain latent fungal  
300 infections and may become symptomatic after planting and serve as a source of inoculum for  
301 further infections of potentially clean plants. Methods of virus detection and eradication have been  
302 crucial in ensuring that the material in germplasm repositories and clean plant programs is free of  
303 known viruses. By allowing the rapid testing of large number of wood samples from mother plants  
304 in foundation blocks and propagation material in nurseries, we expect that the applications of  
305 metabarcoding to trunk pathogen diagnostics will help reduce the amount of trunk pathogens  
306 introduced into vineyards at planting as well as the incidence of young vine decline. Our results  
307 also demonstrated that primer customization and testing are crucial to ensure the validity of DNA  
308 metabarcoding results.

309

## 310 **METHODS**

### 311 **Metabarcoding primers targeting grapevine trunk-associated Ascomycetes (GTAA)**

312 Ribosomal Internal transcribed spacer (ITS) sequences of trunk pathogens and other wood-  
313 colonizing fungi of grape, specifically in the Division Ascomycota, were retrieved from the  
314 TrunkDiseaseID.org database [20]. Sequences were aligned using ClustalW2 (v2.1; [61]) to  
315 identify conserved regions. Sequence alignment was used as input for the metabarcoding primer  
316 design software Primer Prospector v1.0.1 [62], using a sensitivity threshold of 80% and an initial  
317 primer seed size of 5 bp. The ITS sequence of *E. lata* (GeneBank KU721859.1) was used as a  
318 ‘reference’. Primers were selected based on median amplicon size, and mismatches, gaps, and

319 numbers of matches to the sequences in the database. The base pairs ‘AG’ were used as a linker  
320 between the primer and an eight-nucleotide barcodes on the 5’ region of the forward primer  
321 sequence. Barcode sequences were as described in [63]. A list of barcoded forward GTAA primers  
322 is listed in **Additional File 4**.

323 A custom database was compiled with full length ITS sequences of species in the following genera:  
324 *Botryosphaeria*, *Diplodia*, *Dothiorella*, *Lasiodiplodia*, *Neofusicoccum*, *Phaeomoniella*,  
325 *Diaporthe*, *Phaeoacremonium*, *Diatrype*, *Diatrypella*, *Eutypa*, *Xylaria*, *Cylindrocarpon*,  
326 *Campylocarpon*, *Dactylonectria*, *Ilyonectria*, and *Neonectria*. Sequences were retrieved from the  
327 NCBI GenBank repository. Completeness of the ITS sequences was validated using the hidden  
328 Markov models-based software ITSx [64]. Only sequences spanning the entire ITS region (ITS1,  
329 5.8S, and ITS2) were kept for downstream analysis. Species and GenBank accessions of the  
330 complete ITS sequences included in the custom database are listed in **Additional File 2**. To reduce  
331 redundancy and identify outliers, the complete ITS sequences were clustered using the UCLUST  
332 algorithm [65] integrated in Qiime (v1.9.1; [66]) with 97% identity. The longest representative  
333 sequence of each cluster was selected, using the Qiime ‘pick\_rep\_set.py’ function. All  
334 representative sequences were aligned using Mafft v7.271 [67]) with the ‘--auto’ argument and  
335 1,000 iterations. Sequences clustering outside the expected family were removed from the final  
336 custom database.

337 The program Degenerate In-Silico PCR (dispr, <https://github.com/douglasgscfield/dispr>) was  
338 used to predict and evaluate the amplification of sequences of the custom ITS database, using our  
339 GTAA primers, and universal BITS [45], and SP [46] primers. Dispr allowed an amplicon size of  
340 100 to 400 bp, all combinations up to five mismatches in the head of the primer (‘H’ or 5’-most  
341 region), and all combinations up to two mismatches in the tail of the primer (‘T’ or the remaining

342 3'-portion of the primer). The resulting amplicons produced *in silico* were then used for taxonomy  
343 assignment with 80% confidence, using Mothur (v1.39.5; [53]), as it is integrated in Qiime  
344 (v1.9.1). The UNITE database v7.2 [68] was used as taxonomic reference. True positives were  
345 defined as sequences that were assigned to the expected genus, false positives were sequences  
346 assigned to a different genus, and false negatives were sequences not assigned to any genus or  
347 were not amplified by disp.

348 To generate mock communities, we combined (i) DNA from a healthy grapevine with DNA from  
349 pure cultures of three trunk pathogens at different concentrations, or (ii) equal concentrations of  
350 DNA from pure cultures of six trunk pathogens. For the former, grape and fungal DNA were  
351 combined as follows: 90% grape with 10% *E. lata* isolate Napa209 [69], *Phaeoa. minimum* isolate  
352 1119 [70], or *Phaeom. chlamydospora* isolate C42 [71]; 80% grape with 10% of each of two fungal  
353 isolates (in all three pair-wise combinations of the three isolates); and 70% grape DNA with 10%  
354 of each of the three fungal isolates. For the latter, equal concentrations of DNA were combined  
355 from the same three trunk pathogens and three additional species: *N. parvum* isolate UCD646So  
356 [11], *Dia. ampelina* isolate Wolf911 [72], and *Diplodia seriata* isolate SBen831 [73]. Grape DNA  
357 was extracted from the leaves of a non-inoculated, non-wounded plant; this DNA template came  
358 from a previous experiment [74]. The mock communities containing grape DNA were amplified  
359 and sequenced independently three times, whereas the mock community of six fungal DNAs was  
360 amplified and sequenced independently five times. Prior to DNA extraction on Potato Dextrose  
361 Agar (PDA; Difco laboratories, Detroit, MI). DNA was extracted as described in [73] and  
362 measured by Qubit (Life technologies).

363 To test *in planta* detection of a trunk pathogen at variable levels of infection (i.e., from low to high  
364 concentrations of fungal biomass over time), DNAs for the infection time course of *N. parvum*



365 were extracted from the same samples described in [74]. Briefly, 1-year-old potted *V. vinifera*  
366 ‘Cabernet Sauvignon’ FPS 19 plants were inoculated with isolate UCD646So mycelia. Woody  
367 stems were collected at seven time points: 0 hpi, 3 hpi, 24 hpi, 2 wpi, 6 wpi, 8 wpi, and 12 wpi.  
368 Wood samples from 1 cm below the inoculation site were collected using flame-sterilized forceps  
369 and immediately placed in liquid nitrogen for nucleic acids extraction. Infections were confirmed  
370 by positive recovery of the pathogen after 5-day growth on PDA.

371 To test *in planta* detection of multiple trunk pathogens in mixed infection (i.e., to characterize the  
372 species composition of a naturally established trunk-pathogen community), DNA from the same  
373 28 field samples described in [13] was used to make cross-technology comparisons. These field  
374 samples were collected from mature vines (> 8 years-old) showing a variety of the most common  
375 symptoms associated with trunk diseases. Wood samples were collected from distinct plants with  
376 the following combinations of symptoms: Eutypa dieback foliar and wood symptoms, Esca foliar  
377 and wood symptoms, wood symptoms and no foliar symptoms, and apparently healthy plants with  
378 no foliar or wood symptoms.

### 379 **High throughput sequencing libraries**

380 Each sample was amplified using the unique 8-nt barcode forward primer sets for GTAA and  
381 BITS, to enable sample multiplexing. The 25- $\mu$ l PCR reaction mix contained 2 ng of DNA  
382 template, 1X Colorless GoTaq flexi buffer (Promega Corporation, Madison, WI), 1.5 mM MgCl<sub>2</sub>,  
383 0.1 mg/ml BSA, 0.2 mM dNTPs, 0.4  $\mu$ M of each primer, and 1.25 units of GoTaq Flexi DNA  
384 polymerase (Promega Corporation, Madison, WI). PCR program (Veriti thermal cycler, Applied  
385 Biosystems) was as follows: initial denaturation at 94°C for 3 min, followed by 35 cycles at 94°C  
386 for 45 seconds, 55°C for 1 min., and 72°C for 1 min., and a final extension at 72°C for 10 min. In  
387 the experiments to assess primer affinity, reactions were stopped after 5, 10, 15, 20, 25, 30, and 35

388 cycles. Following PCR, amplicon size and uniqueness were verified using gel electrophoresis, and  
389 bands were cleaned using Ampure XP magnetic beads (Agencourt, Beckman Coulter). DNA  
390 concentration was determined for each purified amplicon using Qubit (Life technologies). For the  
391 single isolate validation, amplicons were sequenced with Sanger (DNA Sequencing Facility,  
392 University of California, Davis).

393 For high-throughput sequencing, equimolar amounts of all barcoded amplicons were pooled into  
394 a single sample, the total concentration of which was determined by Qubit. Five hundred  
395 nanograms of pooled DNA were then end-repaired, A-tailed and single-index adapter ligated  
396 (Kapa LTP library prep kit, Kapa Biosystems). After adapter ligation, the sample was size-selected  
397 with two consecutive 1X bead-based cleanups; concentration and size distribution were  
398 determined with Qubit and Bioanalyzer (Agilent Technologies), respectively. DNA libraries were  
399 submitted for sequencing in 250-bp paired-end mode on an Illumina MiSeq (UCDavis Genome  
400 Center DNA technologies Core). All FASTQ files with the amplicon sequences separated by  
401 barcode were deposited in the NCBI Sequence Read Archive (BioProject: PRJNA485180; SRA  
402 accession: SRP156804).

#### 403 **Amplicon sequencing community analysis**

404 Adapter-trimming was carried out using BBDuk (BBMap v.35.82; [http://jgi.doe.gov/data-and-](http://jgi.doe.gov/data-and-tools/bb-tools/)  
405 [tools/bb-tools/](http://jgi.doe.gov/data-and-tools/bb-tools/)) in paired-end mode with sequence “AGATCGGAAG” and the following  
406 parameters: ktrim=r, k=10, mink=6, edist=2, ordered=t, qtrim=f and minlen=150. Adapter-  
407 trimmed FASTQ files were then quality-filtered using Trimmomatic v0.36 [75] with paired-end  
408 mode, phred33, a sliding windows of 4:19, and a minimum length of 150 bp. Sequencing data  
409 were then processed in the Qiime environment v1.9.1 [66]. Barcodes were extracted from the  
410 FASTQ files using the “extract\_barcodes.py” function with the “-a” argument that attempts read

411 orientation and a barcode length of eight base pairs. The resulting sequences and barcodes were  
412 used to tag the reads with “split\_libraries\_fastq.py”, a threshold quality score of 20, and a barcode  
413 size of eight basepairs. Operational taxonomic units (OTUs) were identified with a 99% similarity  
414 threshold using the UCLUST algorithm [65] with the reverse strand match enabled (“-z”), and the  
415 longest sequence of each OUT was chosen as representative sequence. Taxonomy assignment was  
416 carried out using Mothur (v1.39.5; [53] with the UNITE database v7.2 [68] as reference and a 80%  
417 confidence threshold. For each sample, sequences were randomly sampled with the function  
418 “single\_rarefaction.py” from the OTU tables to obtained a total number of sequences per sample  
419 equal to the lowest number of reads across GTAA, BITS, and SP datasets. Taxonomy tables at the  
420 genus level were then created using “summarize\_taxa.py”.

421

## 422 **DECLARATIONS**

### 423 **Ethics approval and consent to participate**

424 Not applicable

### 425 **Consent for publication**

426 Not applicable

### 427 **Availability of data and material**

428 All FASTQ files with the amplicon sequences separated by barcode were deposited in the NCBI  
429 Sequence Read Archive (BioProject: PRJNA485180; SRA accession: SRP156804).

### 430 **Competing interests**

431 The authors declare that they have no competing interests

### 432 **Funding**

433 This work was supported by the American Vineyard Foundation (grants 2016-1798, 2017-1798,  
434 2018-1798) and the USDA, National Institute of Food and Agriculture, Specialty Crop Research  
435 Initiative (grant 2012-51181- 19954). DC was also supported by the Louis P. Martini Endowment  
436 in Viticulture. AMC was partially supported by the Horace O. Lanza Scholarship, Wine Spectator  
437 Scholarship, The Pearl & Albert J. Winkler Scholarship in Viticulture, and the Summer Graduate  
438 Student Researcher Award at UC Davis to support graduate research in engineering, computer  
439 sciences, and disciplines with engineering-related applications and methods.

#### 440 **Authors' contributions**

441 Conceived and designed the experiments: AMC and DC. Performed the lab experiments: RFB,  
442 AMC, ET, and JD. Performed field sampling: PER. Performed bioinformatic analysis: AMC.  
443 Wrote the manuscript: AMC, KB, and DC. All authors read and approved the final manuscript.

444

#### 445 **REFERENCES**

- 446 1. Munkvold G, Duthie J, Marois J: **Reductions in yield and vegetative growth of**  
447 **grapevines due to Eutypa dieback.** *Phytopathology* 1994, **84**(2):186-192.
- 448 2. Siebert J: **Economic impact of Eutypa on the California Wine Grape Industry.**  
449 *Report prepared for the American Vineyard Foundation* 2000.
- 450 3. Kaplan J, Travadon R, Cooper M, Hillis V, Lubell M, Baumgartner K: **Identifying**  
451 **economic hurdles to early adoption of preventative practices: the case of trunk**  
452 **diseases in California winegrape vineyards.** *Wine Economics and Policy* 2016,  
453 **5**(2):127-141.
- 454 4. Bertsch C, Ramírez-Suero M, Magnin-Robert M, Larignon P, Chong J, Abou-Mansour E,  
455 Spagnolo A, Clément C, Fontaine F: **Grapevine trunk diseases: complex and still**  
456 **poorly understood.** *Plant Pathology* 2013, **62**(2):243-265.
- 457 5. Whitelaw-Weckert M, Rahman L, Appleby L, Hall A, Clark A, Waite H, Hardie W: **Co-**  
458 **infection by Botryosphaeriaceae and Ilyonectria spp. fungi during propagation**  
459 **causes decline of young grafted grapevines.** *Plant Pathology* 2013, **62**(6):1226-1237.
- 460 6. Graniti A, Bruno G, Sparapano L: **Three-year observation of grapevines cross-**  
461 **inoculated with esca-associated fungi.** *Phytopathologia Mediterranea* 2001, **40**(3):376-  
462 386.
- 463 7. Pierron RJ, Pouzoulet J, Couderc C, Judic E, Compant S, Jacques A: **Variations in early**  
464 **response of grapevine wood depending on wound and inoculation combinations with**

- 465 **Phaeoacremonium aleophilum and Phaeomoniella chlamydospora.** *Frontiers in plant*  
466 *science* 2016, 7:268.
- 467 8. Cabral A, Rego C, Nascimento T, Oliveira H, Groenewald JZ, Crous PW: **Multi-gene**  
468 **analysis and morphology reveal novel Ilyonectria species associated with black foot**  
469 **disease of grapevines.** *Fungal Biology* 2012, 116(1):62-80.
- 470 9. Halleen F, Fourie PH, Crous PW: **A review of black foot disease of grapevine.**  
471 *Phytopathologia Mediterranea* 2006, 45(4):55-67.
- 472 10. Moller W, Kasimatis A, Kissler J: **A dying arm disease of grape in California [Eutypa**  
473 **armeniaceae].** *Plant Disease Reporter* 1974.
- 474 11. Úrbez-Torres J, Leavitt G, Voegel T, Gubler W: **Identification and distribution of**  
475 **Botryosphaeria spp. associated with grapevine cankers in California.** *Plant Disease*  
476 2006, 90(12):1490-1503.
- 477 12. Lamichhane JR, Venturi V: **Synergisms between microbial pathogens in plant disease**  
478 **complexes: a growing trend.** *Frontiers in Plant Science* 2015, 6(385).
- 479 13. Morales-Cruz A, Allenbeck G, Figueroa-Balderas R, Ashworth VE, Lawrence DP,  
480 Travadon R, Smith RJ, Baumgartner K, Rolshausen PE, Cantu D: **Closed-reference**  
481 **metatranscriptomics enables in planta profiling of putative virulence activities in the**  
482 **grapevine trunk disease complex.** *Molecular plant pathology* 2018, 19(2):490-503.
- 483 14. Gramaje D, Armengol J: **Fungal trunk pathogens in the grapevine propagation**  
484 **process: potential inoculum sources, detection, identification, and management**  
485 **strategies.** *Plant Disease* 2011, 95(9):1040-1055.
- 486 15. Fourie P, Halleen F: **Occurrence of grapevine trunk disease pathogens in rootstock**  
487 **mother plants in South Africa.** *Australasian Plant Pathology* 2004, 33(2):313-315.
- 488 16. Halleen F, Crous R, Petrin O: **Fungi associated with healthy grapevine cuttings in**  
489 **nurseries, with special reference to pathogens involved in the decline of young vines.**  
490 *Australasian Plant Pathology* 2003, 32(1):47-52.
- 491 17. Sosnowski MR, Wicks TJ, Scott ES: **Control of Eutypa dieback in grapevines using**  
492 **remedial surgery.** *Phytopathologia Mediterranea* 2011, 50(4):277-284.
- 493 18. Rolshausen PE, Úrbez-Torres JR, Rooney-Latham S, Eskalen A, Smith RJ, Gubler WD:  
494 **Evaluation of pruning wound susceptibility and protection against fungi associated**  
495 **with grapevine trunk diseases.** *American Journal of Enology and Viticulture* 2010,  
496 61(1):113-119.
- 497 19. Gramaje D, Úrbez-Torres JR, Sosnowski MR: **Managing Grapevine Trunk Diseases**  
498 **With Respect to Etiology and Epidemiology: Current Strategies and Future**  
499 **Prospects.** *Plant Disease* 2018, 102(1):12-39.
- 500 20. Lawrence DP, Travadon R, Nita M, Baumgartner K: **TrunkDiseaseID. org: A**  
501 **molecular database for fast and accurate identification of fungi commonly isolated**  
502 **from grapevine wood.** *Crop Protection* 2017, 102:110-117.
- 503 21. Pouzoulet J, Mailhac N, Couderc C, Besson X, Daydé J, Lummerzheim M, Jacques A: **A**  
504 **method to detect and quantify Phaeomoniella chlamydospora and**  
505 **Phaeoacremonium aleophilum DNA in grapevine-wood samples.** *Applied*  
506 *microbiology and biotechnology* 2013, 97(23):10163-10175.
- 507 22. Pouzoulet J, Rolshausen PE, Schiavon M, Bol S, Travadon R, Lawrence DP,  
508 Baumgartner K, Ashworth VE, Comont G, Corio-Costet M-F: **A method to detect and**  
509 **quantify Eutypa lata and Diplodia seriata-complex DNA in grapevine pruning**  
510 **wounds.** *Plant disease* 2017, 101(8):1470-1480.

- 511 23. Úrbez-Torres J, Haag P, Bowen P, Lowery T, O’Gorman D: **Development of a DNA**  
512 **macroarray for the detection and identification of fungal pathogens causing decline**  
513 **of young grapevines.** *Phytopathology* 2015, **105**(10):1373-1388.
- 514 24. Martín MT, Cobos R, Martín L, López-Enríquez L: **Real-time PCR detection of**  
515 **Phaeomoniella chlamydospora and Phaeoacremonium aleophilum.** *Applied and*  
516 *environmental microbiology* 2012, **78**(11):3985-3991.
- 517 25. Lawrence DP, Travadon R, Baumgartner K: **Novel Seimatosporium Species from**  
518 **Grapevine in Northern California and Their Interactions with Fungal Pathogens**  
519 **Involved in the Trunk-Disease Complex.** *Plant Disease* 2018, **102**(6):1081-1092.
- 520 26. Pancher M, Ceol M, Corneo PE, Longa CMO, Yousaf S, Pertot I, Campisano A: **Fungal**  
521 **endophytic communities in grapevines (Vitis vinifera L.) respond to crop**  
522 **management.** *Applied and environmental microbiology* 2012:AEM. 07655-07611.
- 523 27. Bruez E, Vallance J, Gerbore J, Lecomte P, Da Costa J-P, Guerin-Dubrana L, Rey P:  
524 **Analyses of the temporal dynamics of fungal communities colonizing the healthy**  
525 **wood tissues of esca leaf-symptomatic and asymptomatic vines.** *PLoS One* 2014,  
526 **9**(5):e95928.
- 527 28. Bruez E, Baumgartner K, Bastien S, Travadon R, Guérin-Dubrana L, Rey P: **Various**  
528 **fungal communities colonise the functional wood tissues of old grapevines externally**  
529 **free from grapevine trunk disease symptoms.** *Australian journal of grape and wine*  
530 *research* 2016, **22**(2):288-295.
- 531 29. Schmidt P-A, Bálint M, Greshake B, Bandow C, Römbke J, Schmitt I: **Illumina**  
532 **metabarcoding of a soil fungal community.** *Soil Biology and Biochemistry* 2013,  
533 **65**:128-132.
- 534 30. Whipps J, Hand P, Pink D, Bending GD: **Phyllosphere microbiology with special**  
535 **reference to diversity and plant genotype.** *Journal of applied microbiology* 2008,  
536 **105**(6):1744-1755.
- 537 31. Fierer N, Leff JW, Adams BJ, Nielsen UN, Bates ST, Lauber CL, Owens S, Gilbert JA,  
538 Wall DH, Caporaso JG: **Cross-biome metagenomic analyses of soil microbial**  
539 **communities and their functional attributes.** *Proceedings of the National Academy of*  
540 *Sciences* 2012, **109**(52):21390-21395.
- 541 32. Prober SM, Leff JW, Bates ST, Borer ET, Firn J, Harpole WS, Lind EM, Seabloom EW,  
542 Adler PB, Bakker JD: **Plant diversity predicts beta but not alpha diversity of soil**  
543 **microbes across grasslands worldwide.** *Ecology letters* 2015, **18**(1):85-95.
- 544 33. Xu X, Passey T, Wei F, Saville R, Harrison RJ: **Amplicon-based metagenomics**  
545 **identified candidate organisms in soils that caused yield decline in strawberry.**  
546 *Horticulture research* 2015, **2**:15022.
- 547 34. Abdelfattah A, Cacciola SO, Mosca S, Zappia R, Schena L: **Analysis of the fungal**  
548 **diversity in citrus leaves with greasy spot disease symptoms.** *Microbial ecology* 2017,  
549 **73**(3):739-749.
- 550 35. Deyett E, Roper MC, Ruegger P, Yang J-I, Borneman J, Rolshausen PE: **Microbial**  
551 **Landscape of the Grapevine Endosphere in the Context of Pierce’s Disease.**  
552 *Phytobiomes* 2017, **1**(3):138-149.
- 553 36. Malacrino A, Schena L, Campolo O, Laudani F, Mosca S, Giunti G, Strano CP, Palmeri  
554 V: **A metabarcoding survey on the fungal microbiota associated to the olive fruit fly.**  
555 *Microbial ecology* 2017, **73**(3):677-684.

- 556 37. Quaedvlieg W, Groenewald J, de Jesús Yáñez-Morales M, Crous P: **DNA barcoding of**  
557 **Mycosphaerella species of quarantine importance to Europe.** *Persoonia: Molecular*  
558 *Phylogeny and Evolution of Fungi* 2012, **29**:101.
- 559 38. Bulman S, McDougal R, Hill K, Lear G: **Opportunities and limitations for DNA**  
560 **metabarcoding in Australasian plant-pathogen biosecurity.** *Australasian Plant*  
561 *Pathology* 2018:1-8.
- 562 39. Hodgetts J, Ostojá-Starzewski JC, Prior T, Lawson R, Hall J, Boonham N: **DNA**  
563 **barcoding for biosecurity: case studies from the UK plant protection program.**  
564 *Genome* 2016, **59**(11):1033-1048.
- 565 40. Taberlet P, Coissac E, Pompanon F, Brochmann C, Willerslev E: **Towards next-**  
566 **generation biodiversity assessment using DNA metabarcoding.** *Molecular ecology*  
567 2012, **21**(8):2045-2050.
- 568 41. Taberlet P, Prud'homme SM, Campione E, Roy J, Miquel C, Shehzad W, Gielly L, Rioux  
569 D, Choler P, Clément J-C: **Soil sampling and isolation of extracellular DNA from**  
570 **large amount of starting material suitable for metabarcoding studies.** *Molecular*  
571 *Ecology* 2012, **21**(8):1816-1820.
- 572 42. Schoch CL, Seifert KA, Huhndorf S, Robert V, Spouge JL, Levesque CA, Chen W,  
573 Bolchacova E, Voigt K, Crous PW: **Nuclear ribosomal internal transcribed spacer**  
574 **(ITS) region as a universal DNA barcode marker for Fungi.** *Proceedings of the*  
575 *National Academy of Sciences* 2012, **109**(16):6241-6246.
- 576 43. Bruns TD, White TJ, Taylor JW: **Fungal molecular systematics.** *Annual Review of*  
577 *Ecology and systematics* 1991, **22**(1):525-564.
- 578 44. Coissac E, Riaz T, Puillandre N: **Bioinformatic challenges for DNA metabarcoding of**  
579 **plants and animals.** *Molecular ecology* 2012, **21**(8):1834-1847.
- 580 45. Bokulich NA, Mills DA: **Improved selection of internal transcribed spacer-specific**  
581 **primers enables quantitative, ultra-high-throughput profiling of fungal**  
582 **communities.** *Applied and environmental microbiology* 2013, **79**(8):2519-2526.
- 583 46. Smith DP, Peay KG: **Sequence depth, not PCR replication, improves ecological**  
584 **inference from next generation DNA sequencing.** *PloS one* 2014, **9**(2):e90234.
- 585 47. Bokulich NA, Thorngate JH, Richardson PM, Mills DA: **Microbial biogeography of**  
586 **wine grapes is conditioned by cultivar, vintage, and climate.** *Proceedings of the*  
587 *National Academy of Sciences* 2014, **111**(1):E139-E148.
- 588 48. Setati ME, Jacobson D, Bauer FF: **Sequence-based analysis of the Vitis vinifera L. cv**  
589 **Cabernet Sauvignon grape must mycobiome in three South African vineyards**  
590 **employing distinct agronomic systems.** *Frontiers in microbiology* 2015, **6**:1358.
- 591 49. Bokulich NA, Ohta M, Richardson PM, Mills DA: **Monitoring seasonal changes in**  
592 **winery-resident microbiota.** *PLoS One* 2013, **8**(6):e66437.
- 593 50. Wang C, García-Fernández D, Mas A, Esteve-Zarzoso B: **Fungal diversity in grape**  
594 **must and wine fermentation assessed by massive sequencing, quantitative PCR and**  
595 **DGGE.** *Frontiers in microbiology* 2015, **6**:1156.
- 596 51. Bokulich NA, Collins TS, Masarweh C, Allen G, Heymann H, Ebeler SE, Mills DA:  
597 **Associations among wine grape microbiome, metabolome, and fermentation**  
598 **behavior suggest microbial contribution to regional wine characteristics.** *MBio* 2016,  
599 **7**(3):e00631-00616.
- 600 52. Walters W, Hyde ER, Berg-Lyons D, Ackermann G, Humphrey G, Parada A, Gilbert JA,  
601 Jansson JK, Caporaso JG, Fuhrman JA: **Improved bacterial 16S rRNA gene (V4 and**

- 602 **V4-5) and fungal internal transcribed spacer marker gene primers for microbial**  
603 **community surveys.** *Msystems* 2016, **1**(1):e00009-00015.
- 604 53. Schloss PD, Westcott SL, Ryabin T, Hall JR, Hartmann M, Hollister EB, Lesniewski RA,  
605 Oakley BB, Parks DH, Robinson CJ: **Introducing mothur: open-source, platform-**  
606 **independent, community-supported software for describing and comparing**  
607 **microbial communities.** *Applied and environmental microbiology* 2009, **75**(23):7537-  
608 7541.
- 609 54. Bellemain E, Carlsen T, Brochmann C, Coissac E, Taberlet P, Kausrud H: **ITS as an**  
610 **environmental DNA barcode for fungi: an in silico approach reveals potential PCR**  
611 **biases.** *BMC microbiology* 2010, **10**(1):189.
- 612 55. Clarke LJ, Soubrier J, Weyrich LS, Cooper A: **Environmental metabarcodes for**  
613 **insects: in silico PCR reveals potential for taxonomic bias.** *Molecular ecology*  
614 *resources* 2014, **14**(6):1160-1170.
- 615 56. Kiss L: **Limits of nuclear ribosomal DNA internal transcribed spacer (ITS)**  
616 **sequences as species barcodes for Fungi.** *Proceedings of the National Academy of*  
617 *Sciences* 2012, **109**(27):E1811-E1811.
- 618 57. Kashyap PL, Rai P, Kumar S, Chakdar H, Srivastava AK: **DNA Barcoding for**  
619 **Diagnosis and Monitoring of Fungal Plant Pathogens.** In: *Molecular Markers in*  
620 *Mycology.* Springer; 2017: 87-122.
- 621 58. Travadon R, Lawrence DP, Rooney-Latham S, Gubler WD, Wilcox WF, Rolshausen PE,  
622 Baumgartner K: **Cadophora species associated with wood-decay of grapevine in**  
623 **North America.** *Fungal biology* 2015, **119**(1):53-66.
- 624 59. Úrbez-Torres J, Haag P, Bowen P, O'Gorman D: **Grapevine trunk diseases in British**  
625 **Columbia: incidence and characterization of the fungal pathogens associated with**  
626 **esca and Petri diseases of grapevine.** *Plant Disease* 2014, **98**(4):469-482.
- 627 60. Mugnai L, Graniti A, Surico G: **Esca (black measles) and brown wood-streaking: two**  
628 **old and elusive diseases of grapevines.** *Plant disease* 1999, **83**(5):404-418.
- 629 61. Larkin MA, Blackshields G, Brown N, Chenna R, McGettigan PA, McWilliam H,  
630 Valentin F, Wallace IM, Wilm A, Lopez R: **Clustal W and Clustal X version 2.0.**  
631 *bioinformatics* 2007, **23**(21):2947-2948.
- 632 62. Walters WA, Caporaso JG, Lauber CL, Berg-Lyons D, Fierer N, Knight R:  
633 **PrimerProspector: de novo design and taxonomic analysis of barcoded polymerase**  
634 **chain reaction primers.** *Bioinformatics* 2011, **27**(8):1159-1161.
- 635 63. Harris JK, Sahl JW, Castoe TA, Wagner BD, Pollock DD, Spear JR: **Comparison of**  
636 **normalization methods for construction of large, multiplex amplicon pools for next-**  
637 **generation sequencing.** *Applied and environmental microbiology* 2010, **76**(12):3863-  
638 3868.
- 639 64. Bengtsson-Palme J, Ryberg M, Hartmann M, Branco S, Wang Z, Godhe A, Wit P,  
640 Sánchez-García M, Ebersberger I, Sousa F: **Improved software detection and**  
641 **extraction of ITS1 and ITS2 from ribosomal ITS sequences of fungi and other**  
642 **eukaryotes for analysis of environmental sequencing data.** *Methods in ecology and*  
643 *evolution* 2013, **4**(10):914-919.
- 644 65. Edgar RC: **Search and clustering orders of magnitude faster than BLAST.**  
645 *Bioinformatics* 2010, **26**(19):2460-2461.



- 646 66. Caporaso JG, Kuczynski J, Stombaugh J, Bittinger K, Bushman FD, Costello EK, Fierer  
647 N, Pena AG, Goodrich JK, Gordon JI: **QIIME allows analysis of high-throughput**  
648 **community sequencing data.** *Nature methods* 2010, **7(5):335.**
- 649 67. Katoh K, Standley DM: **MAFFT multiple sequence alignment software version 7:**  
650 **improvements in performance and usability.** *Molecular biology and evolution* 2013,  
651 **30(4):772-780.**
- 652 68. UNITE Community: **UNITE QIIME release.** In. Edited by Community U, Version  
653 01.12.2017 edn; 2017.
- 654 69. Travadon R, Baumgartner K: **Molecular polymorphism and phenotypic diversity in**  
655 **the eutypa dieback pathogen eutypa lata.** *Phytopathology* 2015, **105(2):255-264.**
- 656 70. Massonnet M, Morales-Cruz A, Minio A, Figueroa-Balderas R, Lawrence DP, Travadon  
657 R, Rolshausen PE, Baumgartner K, Cantu D: **Whole-Genome Resequencing and Pan-**  
658 **Transcriptome Reconstruction Highlight the Impact of Genomic Structural**  
659 **Variation on Secondary Metabolite Gene Clusters in the Grapevine Esca Pathogen**  
660 **Phaeoacremonium minimum.** *Frontiers in Microbiology* 2018, **9(1784).**
- 661 71. Latham SR: **Etiology, epidemiology and pathogen biology of Esca disease of**  
662 **grapevines in California.** 2005.
- 663 72. Lawrence DP, Travadon R, Baumgartner K: **Diversity of Diaporthe species associated**  
664 **with wood cankers of fruit and nut crops in northern California.** *Mycologia* 2015,  
665 **107(5):926-940.**
- 666 73. Morales-Cruz A, Amrine KC, Blanco-Ulate B, Lawrence DP, Travadon R, Rolshausen  
667 PE, Baumgartner K, Cantu D: **Distinctive expansion of gene families associated with**  
668 **plant cell wall degradation, secondary metabolism, and nutrient uptake in the**  
669 **genomes of grapevine trunk pathogens.** *BMC genomics* 2015, **16(1):469.**
- 670 74. Massonnet M, Morales-Cruz A, Figueroa-Balderas R, Lawrence DP, Baumgartner K,  
671 Cantu D: **Condition-dependent co-regulation of genomic clusters of virulence factors**  
672 **in the grapevine trunk pathogen Neofusicoccum parvum.** *Molecular plant pathology*  
673 2018, **19(1):21-34.**
- 674 75. Bolger AM, Lohse M, Usadel B: **Trimmomatic: a flexible trimmer for Illumina**  
675 **sequence data.** *Bioinformatics* 2014, **30(15):2114-2120.**

676

## 677 **FIGURE LEGENDS**

678 **Figure 1. Primer design and testing.** (A) Schematic representation of the annealing sites of  
679 forward and reverse GTAA, BITS, and SP primers in the fungal ribosomal ITS. Reported amplicon  
680 sizes were calculated based on the ITS sequence of *Eutypa lata* (KU320617.1). (A) & (B):  
681 Bioanalyzer electropherograms showing amplicons generated using GTAA primers and (A) DNA  
682 from purified organisms as template and (C) field samples with different trunk disease symptoms.

683 *Agrobacterium tumefaciens*, *V. vinifera* and nuclease-free water were included as controls. AH:  
684 apparently healthy, ED: Eutypa Dieback, ES: Esca and WC: wood cankers (no leaf symptoms).  
685 (D) PCR products from grapevines inoculated with *N. parvum* at six weeks post-inoculation, which  
686 were visible on agarose gels at five-cycle intervals, when amplified with primers GTAA, BITS, or  
687 SP. L: 100 bp Ladder. (E) Cycle thresholds (Ct) measured by qPCR of the same reactions shown  
688 in (D).

689 **Figure 2. *In silico* simulation of amplification and taxonomic assignment.** (A) Neighbor-  
690 joining tree of the full-length ITS sequences included in the custom database used in the  
691 simulation. (B) Barplots showing the number of sequences predicted to be amplified by each  
692 primer set at different combinations of mismatches. H: primer head. T: primer tail. Numbers  
693 correspond to the number of mismatches either in H or T. (C) Barplots showing the number of  
694 false negative (FN), false positive (FP), and true positive (TP) sequences with each primer set. (D)  
695 Percentage of sequences per genus correctly assigned with each primer set at the different  
696 mismatch combinations.

697 **Figure 3. Results of DNA metabarcoding of mock communities.** (A) Stacked barplots showing  
698 the relative abundance of genera in the mock communities identified using the GTAA and BITS  
699 primers. Eu: *Eutypa*, Pa: *Phaeoacremonium*, Pm: *Phaeomoniella*, Di: *Diaporthe*, Dp: *Diplodia*,  
700 Np: *Neofusicoccum*, and Vv: *Vitis vinifera*. (B) Linear correlations between observed and expected  
701 abundances for each genus contained in the mock community.

702 **Figure 4. Results of DNA metabarcoding of an infection time-course.** Stacked barplots show  
703 the relative abundance of the genera detected in a time course experiment after inoculation with  
704 *N. parvum*. IW: wound-inoculated with *N. parvum*; NIW: non-inoculated non-wounded; NINW:  
705 non-inoculated non-wounded controls.

706 **Figure 5. Results of DNA metabarcoding of field samples and comparisons with shotgun**  
707 **whole-genome metagenomics (WGS).** (A) Stacked barplots showing the relative abundance of  
708 the genera detected by WGS and DNA metabarcoding with GTAA, BITS, and SP primers. (B)  
709 Scatter plots showing the correlations of the relative abundance obtained by DNA metabarcoding  
710 and WGS. (C) Scatter plots showing the correlations of the relative abundance separately for each  
711 genus obtained by DNA metabarcoding using the GTAA primers and WGS.

## 712 TABLES

713 **Table 1. Metabarcoding primer sequences targeting the ITS region used in this study**

| Primer name | Direction | Primer sequence 5' to 3' | Citation   |
|-------------|-----------|--------------------------|------------|
| GTAA        | Forward   | AAAAC TTCAACAACGGATC     | this study |
| GTAA        | Reverse   | TYCCTACCTGATCCGAGGTC     | this study |
| BITS        | Forward   | CTACCTGCGGARGGATCA       | [45]       |
| BITS        | Reverse   | GAGATCCRTTGYTRAAAGTT     | [45]       |
| SP          | Forward   | CTTGGTCATTTAGAGGAAGTAA   | [46]       |
| SP          | Reverse   | GCTGCGTTCCTCATCGATGC     | [46]       |

714

## 715 ADDITIONAL FILES

716 **Additional File 1: Text S1 (FASTA).** Assembled amplicon sequences produced by the GTAA  
717 primers and sequenced with Sanger.

718 **Additional File 2: Table S1 (XLSX).** List of filtered sequences retrieved from the NCBI used as  
719 a database for primer testing and test results per primer. TP: True Positive, FP: False Positive and  
720 FN: False Negative.

721 **Additional File 3: Figure S1 (PDF).** Venn diagram of genera detected by the GTAA and BITS  
722 primers from the field samples detected with more than 0.05% abundance per sample.

723 **Additional File 4: Table S2 (XLSX).** List of forward GTAA primers with linker and barcodes

ITS region of *Eutypa lata* (KU320617.1)

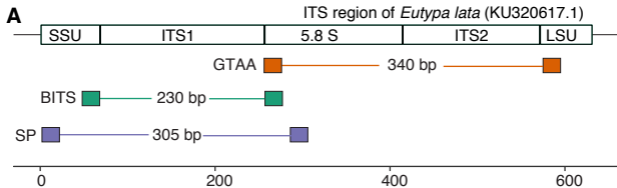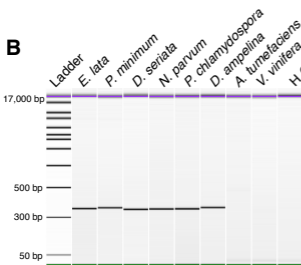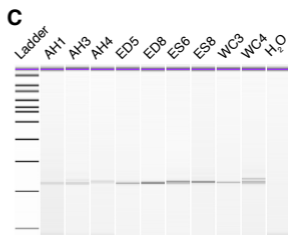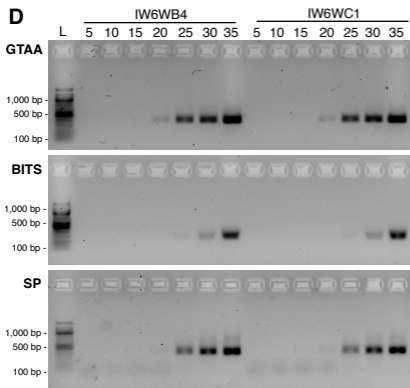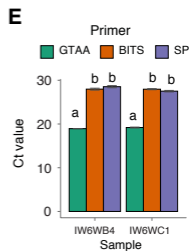

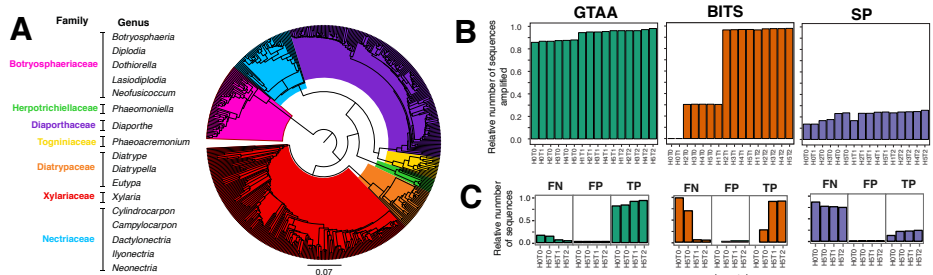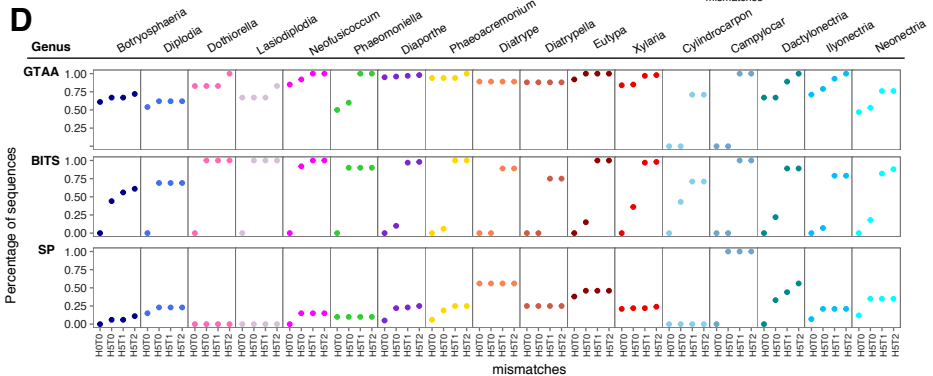

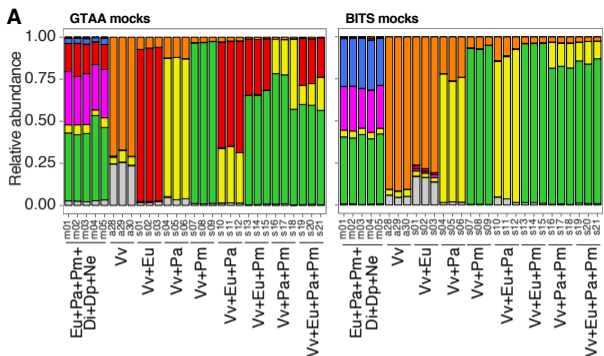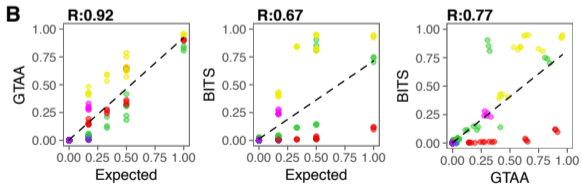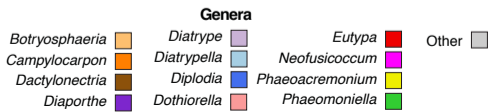

**GTAA *N. parvum* experiment**

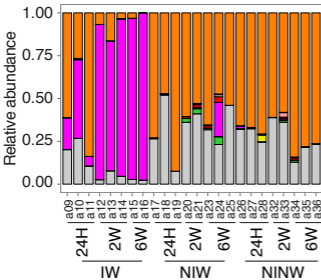

**BITS *N. parvum* experiment**

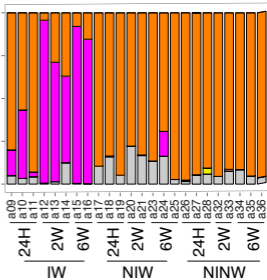

**Genera**

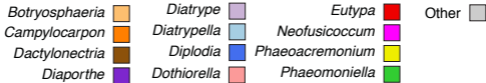

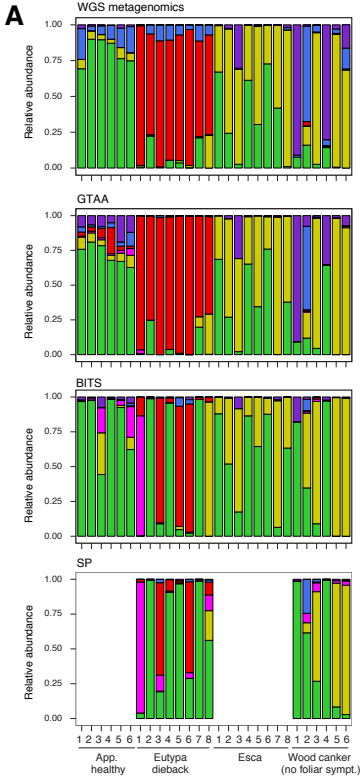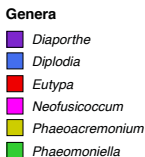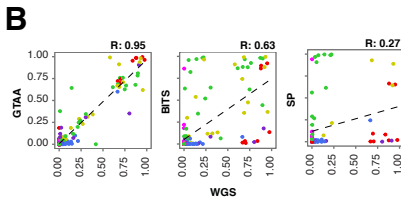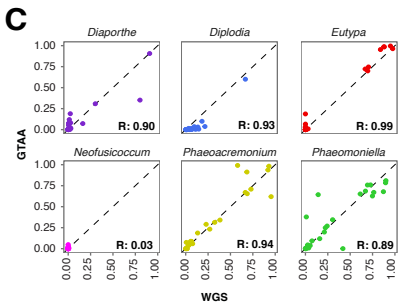

Source: http://biorxiv.org/content/10.1101/409169v1.full.pdf
